# Supplementary material
Source: publisher site journal article supplement (https://www.spandidos-publications.com/6982/downloadSupplementary)
Supplement: Supplementary file 1 [file downloadSupplementary]

**Table SI.** siRNA sequences for CALCR.

| Gene       | sense 5'-3'           | antisense 5'-3'       |
|------------|-----------------------|-----------------------|
| si-NC      | UUCUCCGAACGUGUCACGUTT | ACGUGACACGUUCGGAGAATT |
| si-CALCR-1 | CGUAGGACGAAAGAAGAUGAU | AUCAUCUUCUUCGUCCUACG  |
| si-CALCR-2 | CCAACCACUAUCCAUGCUAUU | AAUAGCAUGGAUAGUGGUUGG |
| si-CALCR-3 | CCUUUGAAUAUCAUAGAGCAA | UUGCUCUAUGAUAUUCAAGG  |

si, small interfering; CALCR, calcitonin receptor; NC, negative control.

**Table SII.** Primers for reverse transcription-quantitative PCR.

| Gene                | Forward                 | Reverse                 |
|---------------------|-------------------------|-------------------------|
| Calcitonin receptor | CCTATCCAACAATAGAGCCCAAG | TGCATTCCGGTCATAGCATTGTA |
| GAPDH               | GGAGCGAGATCCCTCCAAAAT   | GGCTGTTGTCATACTTCTCATGG |
